# Supplementary material for: Assessment of cattle genetic introgression into domestic yak populations using mitochondrial and microsatellite DNA markers
Source: PubMed Central journal article supplement (PMC2878598; doi:10.1111/j.1365-2052.2009.01989.x), 2010-06
Supplement: age0041-0242-SD1.pdf [file age0041-0242-SD1.pdf]

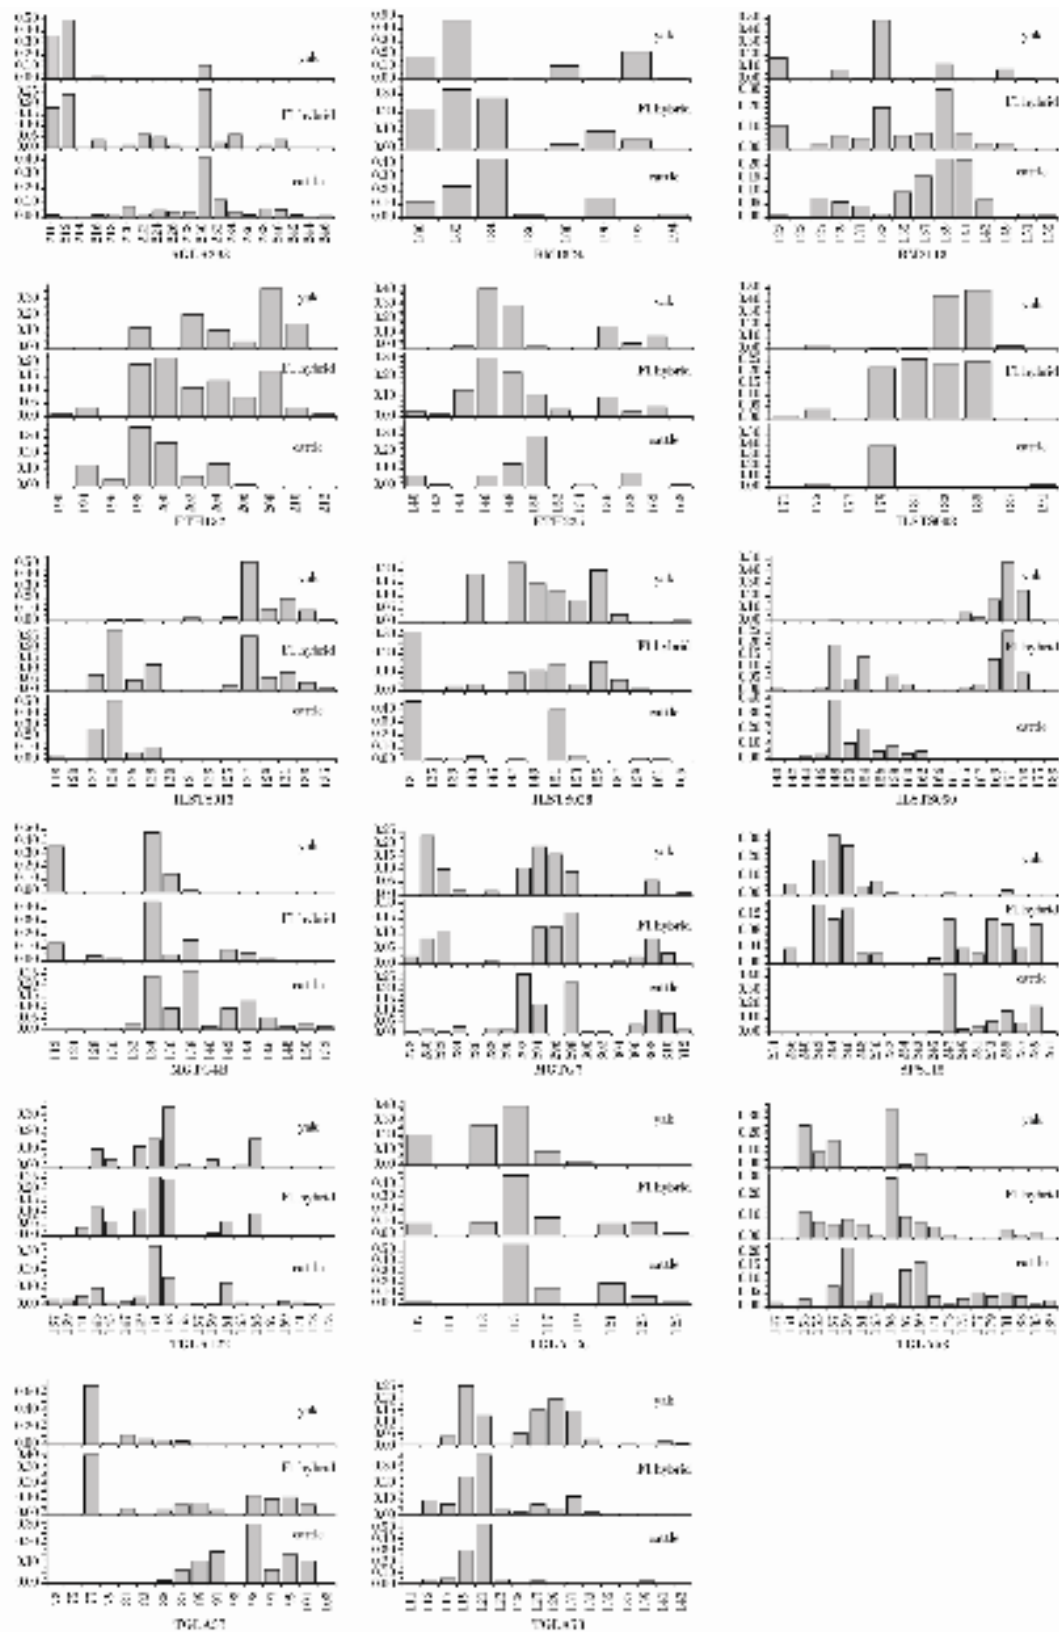

**Figure S1.** Allele spectra of 17 microsatellite loci in yak, cattle and their  $F_1$  hybrid populations. The Y-axis represents the allele frequency and the X-axis the allele sizes.
