# Supplementary material for: Assessment of cattle genetic introgression into domestic yak populations using mitochondrial and microsatellite DNA markers
Source: PubMed Central journal article supplement (PMC2878598; doi:10.1111/j.1365-2052.2009.01989.x), 2010-06
Supplement: age0041-0242-SD2.pdf [file age0041-0242-SD2.pdf]

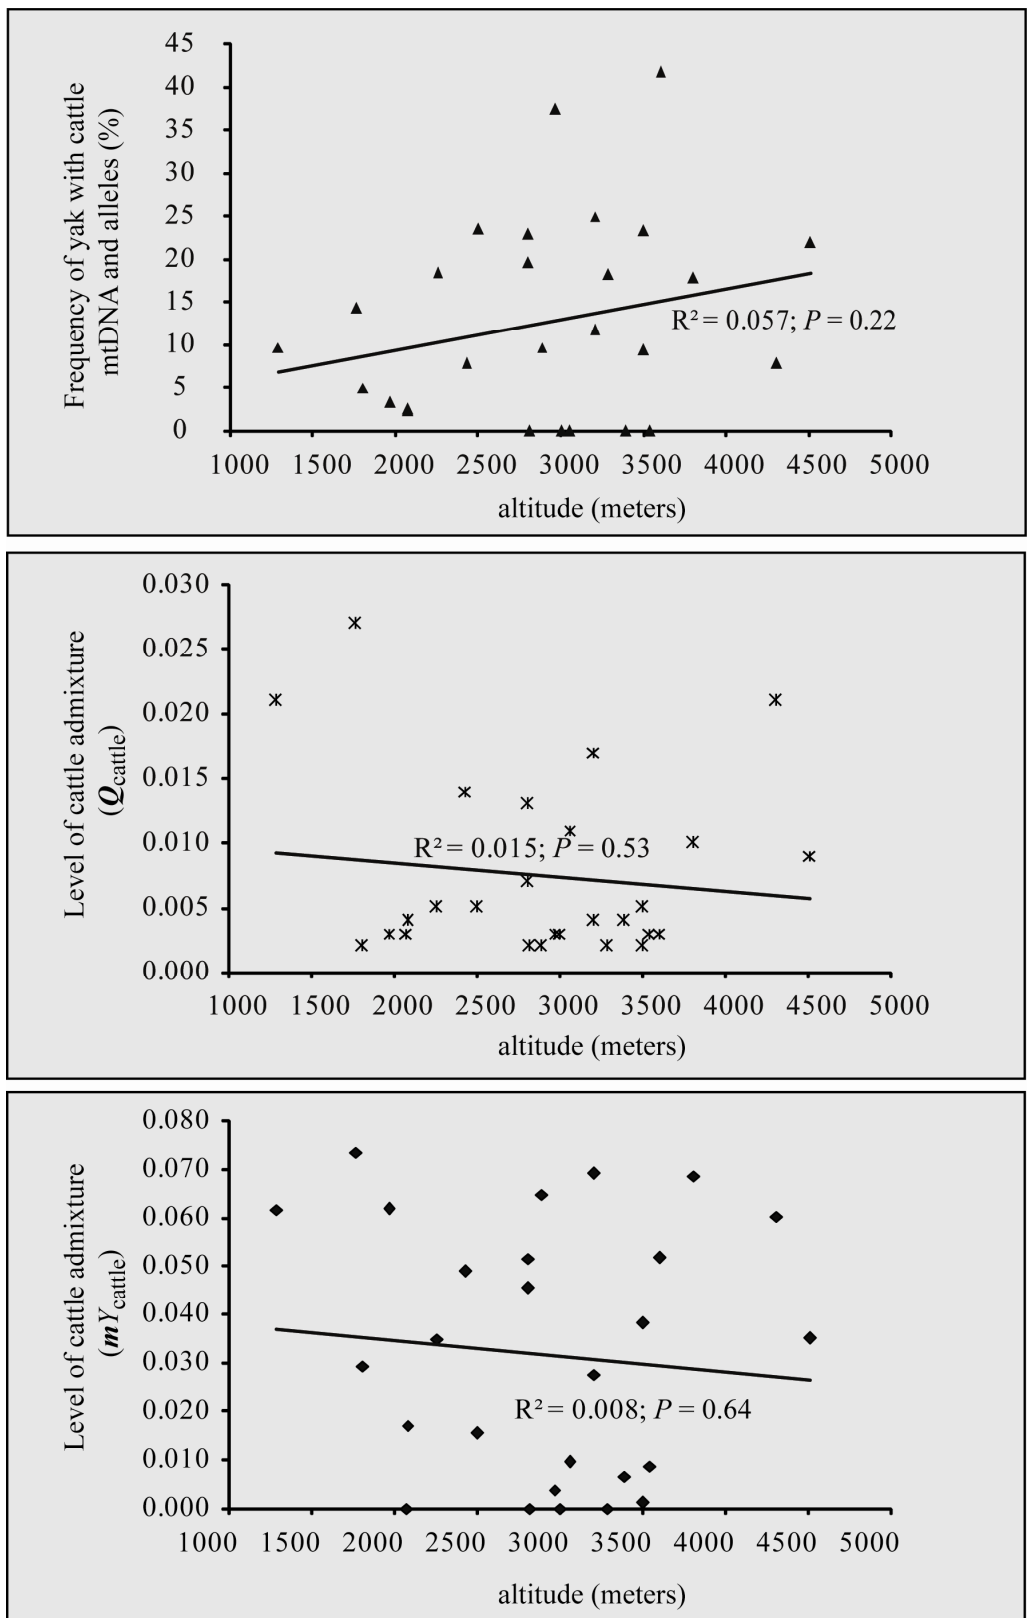

**Figure S2.** Correlation between the level of cattle admixture and the altitude of geographic location across geographic regions.
