# Supplementary material for: Assessment of cattle genetic introgression into domestic yak populations using mitochondrial and microsatellite DNA markers
Source: PubMed Central journal article supplement (PMC2878598; doi:10.1111/j.1365-2052.2009.01989.x), 2010-06
Supplement: age0041-0242-SD4.pdf [file age0041-0242-SD4.pdf]

**Table S1.** Seventeen microsatellite loci and their PCR conditions and allele size ranges in domestic yak populations

| <b>Locus Name</b>    | <b>Chr*</b> | <b>Primer sequence (5' - 3')<br/>Forward (above) and Reverse (below)</b> | <b>A.T.<br/>(°C)</b> | <b>Forward primer<br/>Label</b> | <b>Allele range<br/>(base pairs)</b> |
|----------------------|-------------|--------------------------------------------------------------------------|----------------------|---------------------------------|--------------------------------------|
| AGLA293<br>(D5S13)   | 5           | GAAACTCAACCCAAGACAACCTCAAG<br>ATGACTTTATTCTCCACCTAGCAGA                  | 55                   | FAM                             | 210-240                              |
| BM1824<br>(D1S34)    | 1           | GAGCAAGGTGTTTTTCCAATC<br>CATTCTCCAACCTGCTTCCTTG                          | 58                   | TET                             | 180-194                              |
| BM2113<br>(D2S26)    | 2           | GCTGCCTTCTACCAAATACCC<br>CTTCCTGAGAGAAGCAACACC                           | 58                   | TET                             | 123-151                              |
| ETH152<br>(D5S1)     | 5           | TACTCGTAGGGCAGGCTGCCTG<br>GAGACCTCAGGGTTGGTGATCAG                        | 55                   | TET                             | 194-212                              |
| ETH225<br>(D9S1)     | 9           | GATCACCTTGCCACTATTTCT<br>ACATGACAGCCAGCTGCTACT                           | 65                   | FAM                             | 144-162                              |
| ILSTS008<br>(D14S15) | 14          | GAATCATGGATTTTCTGGGG<br>TAGCAGTGAGTGAGGTTGGC                             | 58                   | FAM                             | 175-187                              |
| ILSTS013<br>(D9S10)  | 9           | CTTGATCCTTATAGAACTGG<br>ACACAAAATCAGATCAGTGG                             | 58                   | HEX                             | 121-135                              |
| ILSTS028<br>(D11S63) | 11          | TCCAGATTTTGTACCAGACC<br>GTCATGTCATACCTTTGAGC                             | 55                   | FAM                             | 131-165                              |
| ILSTS050<br>(D2S45)  | 2           | AAATCAGACACCCAGTTTCC<br>GTTTTTCTACACGAGTTGGC                             | 55                   | TET                             | 161-183                              |
| MGTG4B<br>(D4S5)     | 4           | GAGCAGCTTCTTTCTTTCTCATCTT<br>GCTCTTGGAAGCTTATTGTATAAAG                   | 55                   | FAM                             | 112-138                              |
| MGTG7<br>(D23S5)     | 23          | TTCATTGCAGCACTATTTACAATAG<br>TAAGTCCCTGTATCATTTTTTTGAA                   | 55                   | TET                             | 278-312                              |
| SPS115               | 15          | AAAGTGACACAACAGCTTCTCCAG<br>AACGAGTGTCCCTAGTTTGGCTGTG                    | 65                   | TET                             | 234-254                              |
| TGLA122<br>(D21S6)   | 21          | CCCTCCTCCAGGTAATCAGC<br>AATCACATGGCAAATAAGTACATAC                        | 55                   | HEX                             | 143-175                              |
| TGLA126<br>(D20S1)   | 20          | CTAATTTAGAATGAGAGAGGCTTCT<br>TTGGTCTCTATTCTCTGAATATTCC                   | 55                   | HEX                             | 107-121                              |
| TGLA53<br>(D16S3)    | 16          | GCTTTCAGAAATAGTTTGCATTCA<br>ATCTTCACATGATATTACAGCAGA                     | 55                   | TET                             | 151-181                              |
| TGLA57<br>(D1S8)     | 1           | GCTTTTTAATCCTCAGCTTGCTG<br>GCTTCCAAAACCTTACAATATGTAT                     | 55                   | FAM                             | 77-99                                |
| TGLA73<br>(D9S3)     | 9           | GAGAATCACCTAGAGAGAGGCA<br>CTTTCTTTTAAATTCTATATGGT                        | 55                   | FAM                             | 111-143                              |

\* Cattle chromosome assignments are given.

A.T., annealing temperature for PCR amplification.
