# Supplementary material for: Assessment of cattle genetic introgression into domestic yak populations using mitochondrial and microsatellite DNA markers
Source: PubMed Central journal article supplement (PMC2878598; doi:10.1111/j.1365-2052.2009.01989.x), 2010-06
Supplement: age0041-0242-SD5.pdf [file age0041-0242-SD5.pdf]

**Table S2.** Yak individuals showing cattle-specific mtDNA and microsatellite alleles and  $Q_{\text{cattle}}$  proportions

| yak individuals | $Q_{\text{cattle}}$ | $Q_{\text{yak}}$ | mtDNA | ILSTS013           | ILSTS050 | SPS115 |
|-----------------|---------------------|------------------|-------|--------------------|----------|--------|
| AH12            | 0.045               | 0.955            |       |                    |          | Yes    |
| AH28            | 0.329               | 0.671            |       | Yes                | Yes      |        |
| AH30            | 0.039               | 0.961            |       |                    | Yes      |        |
| AH32            | 0.145               | 0.855            | Yes   |                    |          |        |
| AH46            | 0.238               | 0.762            |       | Yes                | Yes      |        |
| AH55            | 0.002               | 0.998            | Yes   |                    |          |        |
| AH58            | 0.294               | 0.706            |       | Yes                |          |        |
| AS07            | 0.002               | 0.998            |       | Yes                |          |        |
| AS27            | 0.002               | 0.998            |       | Yes                |          |        |
| AS33            | 0.017               | 0.983            |       |                    | Yes      |        |
| BZ04            | 0.026               | 0.974            |       |                    |          | Yes    |
| BZ19            | 0.002               | 0.998            |       |                    |          | Yes    |
| BZ34            | 0.019               | 0.981            |       |                    |          | Yes    |
| BZ42            | 0.002               | 0.998            |       |                    |          | Yes    |
| CB03            | 0.001               | 0.999            | Yes   |                    |          |        |
| CB04            | 0.161               | 0.839            |       |                    |          | Yes    |
| CB28            | 0.04                | 0.96             |       | Yes                |          |        |
| DT09            | 0.002               | 0.998            |       |                    |          | Yes    |
| DT13            | 0.001               | 0.999            |       |                    |          | Yes    |
| DT17            | 0.014               | 0.986            |       |                    | Yes      |        |
| DT25            | 0.003               | 0.997            |       |                    |          | Yes    |
| DT26            | 0.047               | 0.953            |       |                    | Yes      |        |
| DT32            | 0.002               | 0.998            | Yes   |                    |          |        |
| DT36            | 0.026               | 0.974            | Yes   | Yes                |          |        |
| GA02            | 0.181               | 0.819            |       | Yes                |          |        |
| GA11            | 0.244               | 0.756            |       | Yes                |          |        |
| GA26            | 0.003               | 0.997            | Yes   |                    |          |        |
| HG13            | 0.001               | 0.999            |       | Yes,<br>homozygote |          |        |
| JZ03            | 0.063               | 0.937            |       |                    |          | Yes    |
| JZ04            | 0.025               | 0.975            |       |                    |          | Yes    |
| JZ05            | 0.002               | 0.998            |       |                    |          | Yes    |
| JZ09            | 0.024               | 0.976            |       |                    |          | Yes    |
| JZ15            | 0.004               | 0.996            |       |                    |          | Yes    |
| JZ16            | 0.006               | 0.994            |       |                    |          | Yes    |
| JZ32            | 0.003               | 0.997            |       |                    |          | Yes    |
| JZ35            | 0.009               | 0.991            |       | Yes                |          | Yes    |
| KG16            | 0.016               | 0.984            |       |                    |          | Yes    |
| LQ10            | 0.009               | 0.991            |       |                    |          | Yes    |
| LQ13            | 0.002               | 0.998            |       |                    |          | Yes    |
| LQ14            | 0.002               | 0.998            | Yes   |                    |          |        |
| LQ18            | 0.007               | 0.993            |       |                    |          | Yes    |
| LQ27            | 0.002               | 0.998            |       |                    |          | Yes    |
| LQ28            | 0.002               | 0.998            |       |                    |          | Yes    |
| LQ32            | 0.003               | 0.997            |       |                    |          | Yes    |
| MQ08            | 0.002               | 0.998            |       |                    |          | Yes    |
| MQ11            | 0.002               | 0.998            |       |                    |          | Yes    |
| MQ14            | 0.002               | 0.998            |       |                    |          | Yes    |
| MQ15            | 0.125               | 0.875            |       |                    | Yes      |        |
| MQ27            | 0.021               | 0.979            |       | Yes                |          |        |

|      |       |       |     |                    |     |                    |
|------|-------|-------|-----|--------------------|-----|--------------------|
| MQ31 | 0.018 | 0.982 |     |                    |     | Yes                |
| MQ34 | 0.005 | 0.995 |     |                    |     | Yes                |
| MQ45 | 0.027 | 0.973 |     |                    |     | Yes,<br>Homozygote |
| MW05 | 0.011 | 0.989 |     | Yes                |     |                    |
| MW06 | 0.012 | 0.988 |     | Yes                |     |                    |
| MW17 | 0.016 | 0.984 |     | Yes                |     |                    |
| MW20 | 0.002 | 0.998 |     |                    |     | Yes                |
| MW21 | 0.003 | 0.997 |     |                    |     | Yes                |
| MW23 | 0.098 | 0.902 |     | Yes,<br>homozygote |     |                    |
| MW27 | 0.003 | 0.997 |     |                    |     | Yes                |
| MW30 | 0.002 | 0.998 |     |                    |     | Yes                |
| MW32 | -     | -     | Yes | -                  | -   | -                  |
| MW39 | -     | -     | Yes | -                  | -   | -                  |
| NI01 | 0.005 | 0.995 |     | Yes                |     |                    |
| NI03 | 0.002 | 0.998 |     | Yes                |     |                    |
| NI07 | 0.016 | 0.984 |     | Yes                |     |                    |
| NI08 | 0.007 | 0.993 |     | Yes                |     |                    |
| NI09 | 0.008 | 0.992 |     | Yes                |     |                    |
| NI15 | 0.002 | 0.998 |     | Yes                |     |                    |
| NI19 | 0.004 | 0.996 |     | Yes                |     |                    |
| NI50 | 0.033 | 0.967 |     |                    |     | Yes                |
| RU09 | 0.002 | 0.998 | Yes |                    |     |                    |
| RU17 | 0.013 | 0.987 |     | Yes,<br>homozygote |     |                    |
| SJ07 | 0.048 | 0.952 |     | Yes                |     |                    |
| SJ08 | 0.146 | 0.854 |     | Yes,<br>homozygote |     |                    |
| SJ11 | 0.146 | 0.854 |     | Yes                |     |                    |
| SJ12 | 0.002 | 0.998 | Yes |                    |     |                    |
| SJ15 | 0.002 | 0.998 |     |                    |     | Yes                |
| SJ18 | 0.009 | 0.991 |     | Yes                |     |                    |
| SJ21 | 0.01  | 0.99  |     | Yes                |     |                    |
| SJ22 | 0.07  | 0.93  |     | Yes,<br>homozygote |     |                    |
| SJ26 | 0.042 | 0.958 |     | Yes                |     |                    |
| SN03 | 0.002 | 0.998 |     |                    |     | Yes                |
| SN11 | 0.011 | 0.989 | Yes |                    |     |                    |
| SN12 | 0.008 | 0.992 |     | Yes                |     |                    |
| SN13 | 0.002 | 0.998 | Yes |                    |     |                    |
| SN15 | 0.011 | 0.989 |     |                    |     | Yes                |
| SN19 | 0.015 | 0.985 |     |                    |     | Yes                |
| SN22 | 0.003 | 0.997 |     |                    |     | Yes                |
| SN29 | 0.007 | 0.993 |     | Yes                |     |                    |
| SN38 | 0.003 | 0.997 |     |                    |     | Yes,<br>Homozygote |
| TB02 | 0.001 | 0.999 | Yes |                    |     |                    |
| TB05 | 0.002 | 0.998 | Yes | Yes                |     |                    |
| TB13 | 0.002 | 0.998 | Yes |                    |     |                    |
| TB18 | 0.003 | 0.997 | Yes |                    |     |                    |
| TB25 | 0.007 | 0.993 |     |                    |     | Yes                |
| TB31 | 0.048 | 0.952 |     |                    | Yes |                    |

|      |       |       |     |     |     |     |
|------|-------|-------|-----|-----|-----|-----|
| TB36 | 0.002 | 0.998 | Yes |     |     |     |
| TB45 | 0.006 | 0.994 |     | Yes |     |     |
| TB47 | 0.011 | 0.989 |     |     |     | Yes |
| TJ05 | 0.005 | 0.995 |     | Yes |     | Yes |
| TJ06 | 0.006 | 0.994 |     |     |     | Yes |
| TJ09 | 0.014 | 0.986 |     |     |     | Yes |
| TJ16 | 0.002 | 0.998 |     |     |     | Yes |
| TJ20 | 0.01  | 0.99  |     |     |     | Yes |
| TJ22 | 0.049 | 0.951 |     |     |     | Yes |
| TJ27 | 0.004 | 0.996 |     |     |     | Yes |
| TJ31 | 0.002 | 0.998 |     |     |     | Yes |
| TJ39 | 0.002 | 0.998 |     |     |     | Yes |
| TJ42 | 0.002 | 0.998 |     |     |     | Yes |
| TJ47 | 0.002 | 0.998 |     |     |     | Yes |
| TW13 | 0.002 | 0.998 |     |     |     | Yes |
| TW17 | 0.002 | 0.998 |     |     |     | Yes |
| TW18 | 0.002 | 0.998 |     |     |     | Yes |
| TW25 | 0.006 | 0.994 |     |     |     | Yes |
| TW26 | 0.002 | 0.998 |     |     |     | Yes |
| TW27 | 0.002 | 0.998 |     |     |     | Yes |
| TW36 | 0.001 | 0.999 |     |     | Yes |     |
| TW39 | 0.004 | 0.996 |     |     | Yes |     |
| TW40 | 0.003 | 0.997 |     |     | Yes |     |
| TW44 | 0.002 | 0.998 |     |     |     | Yes |
| TW50 | 0.002 | 0.998 | Yes |     |     |     |
| UB07 | 0.04  | 0.96  |     |     | Yes |     |
| UG19 | 0.309 | 0.691 |     |     |     | Yes |
| UG26 | 0.042 | 0.958 |     | Yes |     |     |
| UG28 | 0.204 | 0.796 |     | Yes |     |     |
| XH08 | 0.076 | 0.924 |     |     |     | Yes |
| XH16 | 0.002 | 0.998 |     |     |     | Yes |

Note: -, No data available.
